# Supplementary material
Source: Springer Nature journal article supplement (https://www.springermedizin.de/resource/supplementary/12935_2011_323_MOESM2_ESM.pdf/9540344)

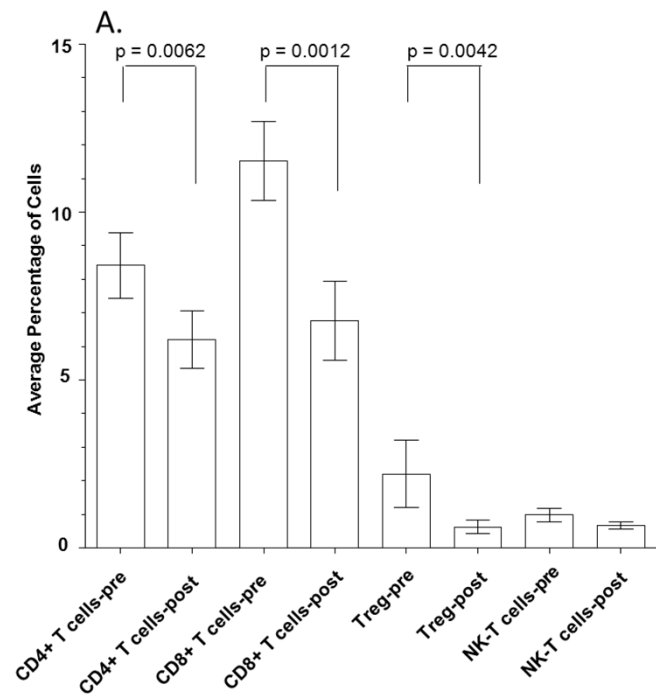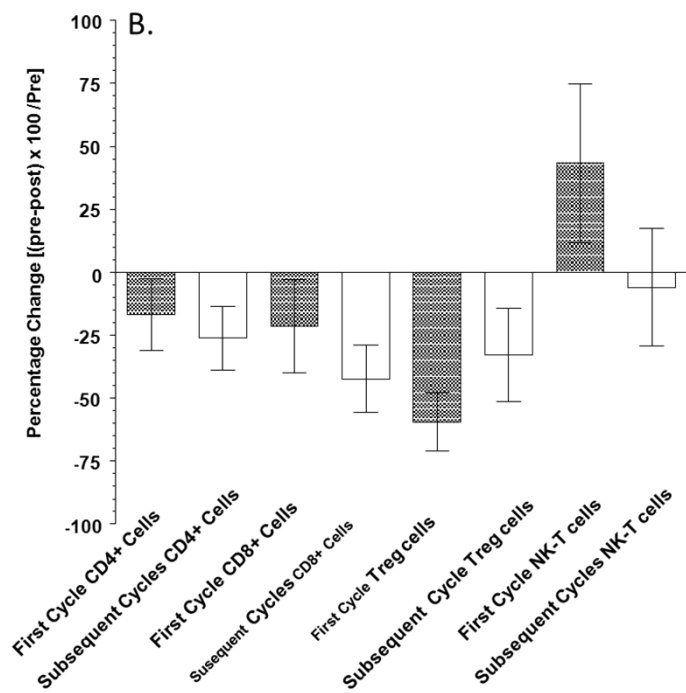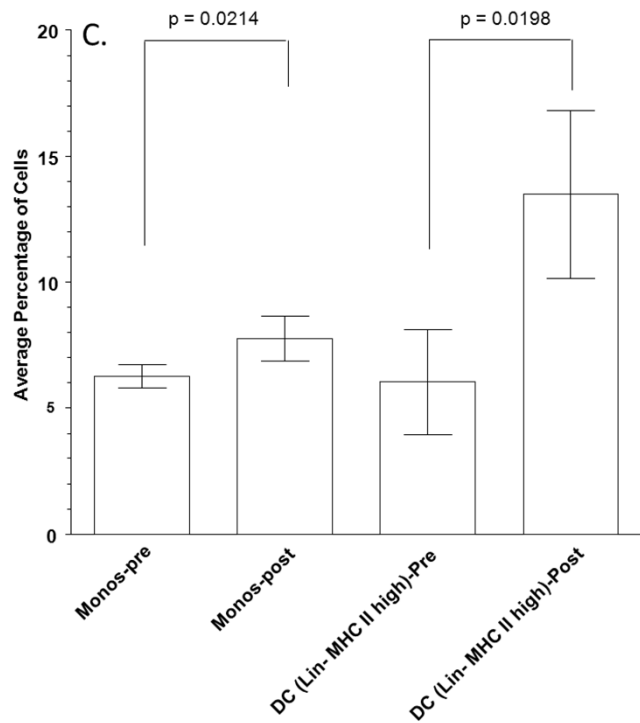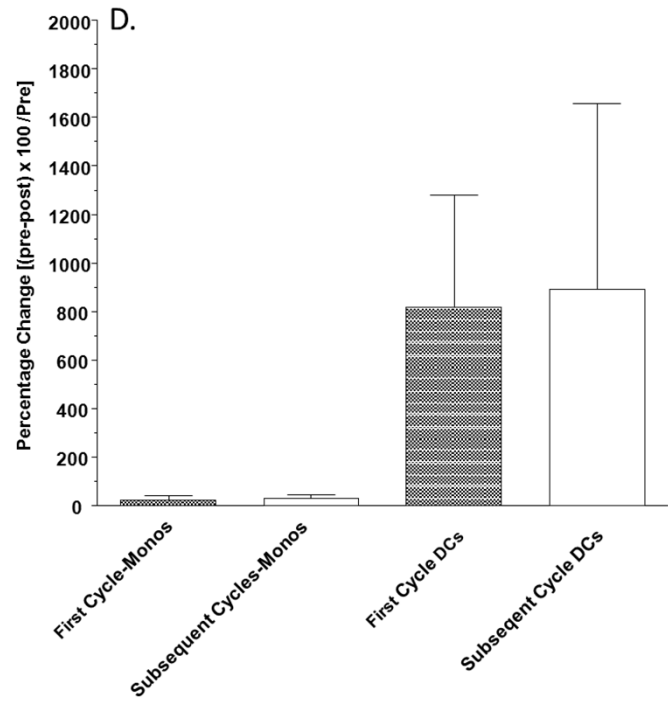

Supplement: MOESM2 [file 9540344]
